# Supplementary material
Source: publisher site journal article supplement (https://www.dovepress.com/article/253749)
Supplement: Supplementary file 1 [file get_supplementary_file.php]

Appendix

Supplementary table 1: distribution of the sample according to attitude questions. (N=1386).

| Questions | Response | Frequency (%) |
| --- | --- | --- |
| I am confident of my ability to discuss e-cigarettes with my children. | strongly disagree | 156 (11.3) |
| disagree | 80 (5.8) |
| neutral | 309 (22.3) |
| agree | 191 (13.8) |
| strongly agree | 650 (46.9) |
| I am confident of my ability to discuss regular smoking with my children. | strongly disagree | 114 (8.2) |
| disagree | 43 (3.1) |
| neutral | 200 (14.4) |
| agree | 191 (13.8) |
| strongly agree | 838 (60.5) |
| I accept that my children smoke regular cigarettes. | strongly disagree | 1249 (90.1) |
| disagree | 48 (3.5) |
| neutral | 41 (3.0) |
| agree | 14 (1.0) |
| strongly agree | 34 (2.5) |
| I accept that my children vape e-cigarettes. | strongly disagree | 1246 (89.9) |
| disagree | 55 (4.0) |
| neutral | 51 (3.7) |
| agree | 14 (1.0) |
| strongly agree | 20 (1.4) |
| I accept for my sons to smoke/vape more than for my daughters. | strongly disagree | 1208 (87.1) |
| disagree | 46 (3.3) |
| neutral | 72 (5.2) |
| agree | 23 (1.7) |
| strongly agree | 37 (2.7) |
| It is important to educate parents about smoking/vaping | strongly disagree | 81 (5.8) |
| disagree | 17 (1.2) |
| neutral | 120 (8.7) |
| agree | 96 (6.9) |
| strongly agree | 1072 (77.3) |
| E-cigarettes use causes addiction | strongly disagree | 126 (9.1) |
| disagree | 57 (4.1) |
| neutral | 437 (31.5) |
| agree | 158 (11.4) |
| strongly agree | 608 (43.9) |
| E-cigarettes is better than regular smoking for my children. | strongly disagree | 980 (70.7) |
| disagree | 87 (6.3) |
| neutral | 207 (14.9) |
| agree | 46 (3.3) |
| strongly agree | 66 (4.80) |
